# Supplementary material for: Synthesis of nanoscale zero-valent iron immobilized in alginate microcapsules for removal of Pb(ii) from aqueous solution
Source: Royal Society of Chemistry journal article supplement (doi:10.1039/c4ta02920h), 2014-07-23
Supplement: c4ta02920h1.pdf [file c4ta02920h1.pdf]

1 **Synthesis of Nanoscale Zero-valent Iron Immobilized**  
2 **in Alginate Microcapsules for Removal of Pb(II) from**  
3 **Aqueous Solution**

4 Si Luo <sup>a</sup>, Tingting Lu <sup>a</sup>, Liang Peng <sup>a</sup>, Jihai Shao <sup>a</sup>, Qingru Zeng <sup>a</sup>, Ji-Dong Gu <sup>a,b,\*</sup> □

5 <sup>a</sup> *College of Resources and Environment, Hunan Agricultural University, Changsha*  
6 *410128, PR China.*

7 <sup>b</sup> *Laboratory of Environmental Microbiology and Toxicology, School of Biological*  
8 *Sciences, The University of Hong Kong, Pokfulam Road, Hong Kong SAR, PR China.*

9

10 **Figures captions:**

11 Fig. S1 The synthesized NZVI-alginate microcapsules

12 Fig. S2 Sedimentation of un-immobilized NZVI and M-NZVI particles in 5 mM  
13 sodium bicarbonate. Particles concentration is 100 mg/L in all cases.

14

15

16

17

18

19

20

21

---

\* Tel: (852) 2299 0605, Fax: (852) 2559 9114.

E-mail: jdgu@hkcc.hku.hk

22 Fig. S1.

23

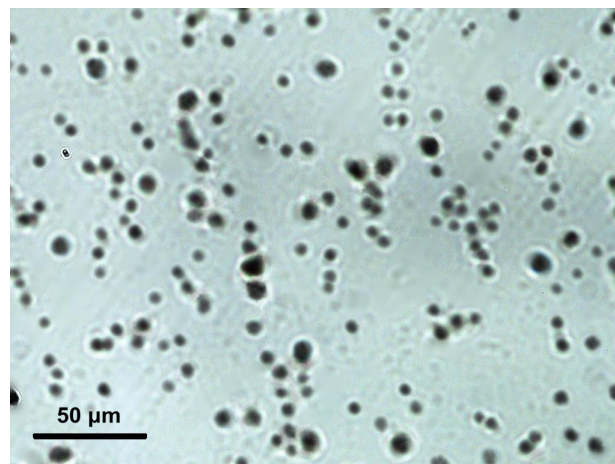

24

25

26

27

28 Fig. S2.

29

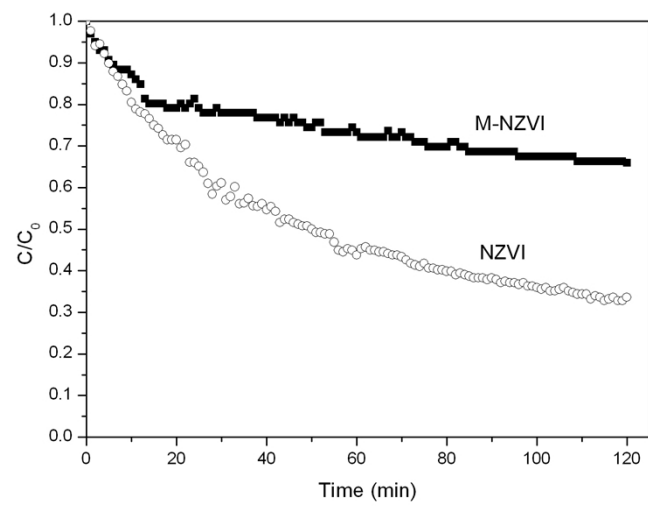

30

31

32
